# Supplementary material
Source: MDPI journal article supplement (https://www.mdpi.com/2571-6255/4/2/17)
Supplement: s1 [file s1]

# Supplementary Material

Details of sites of charcoal records from the mainland and Tasmania

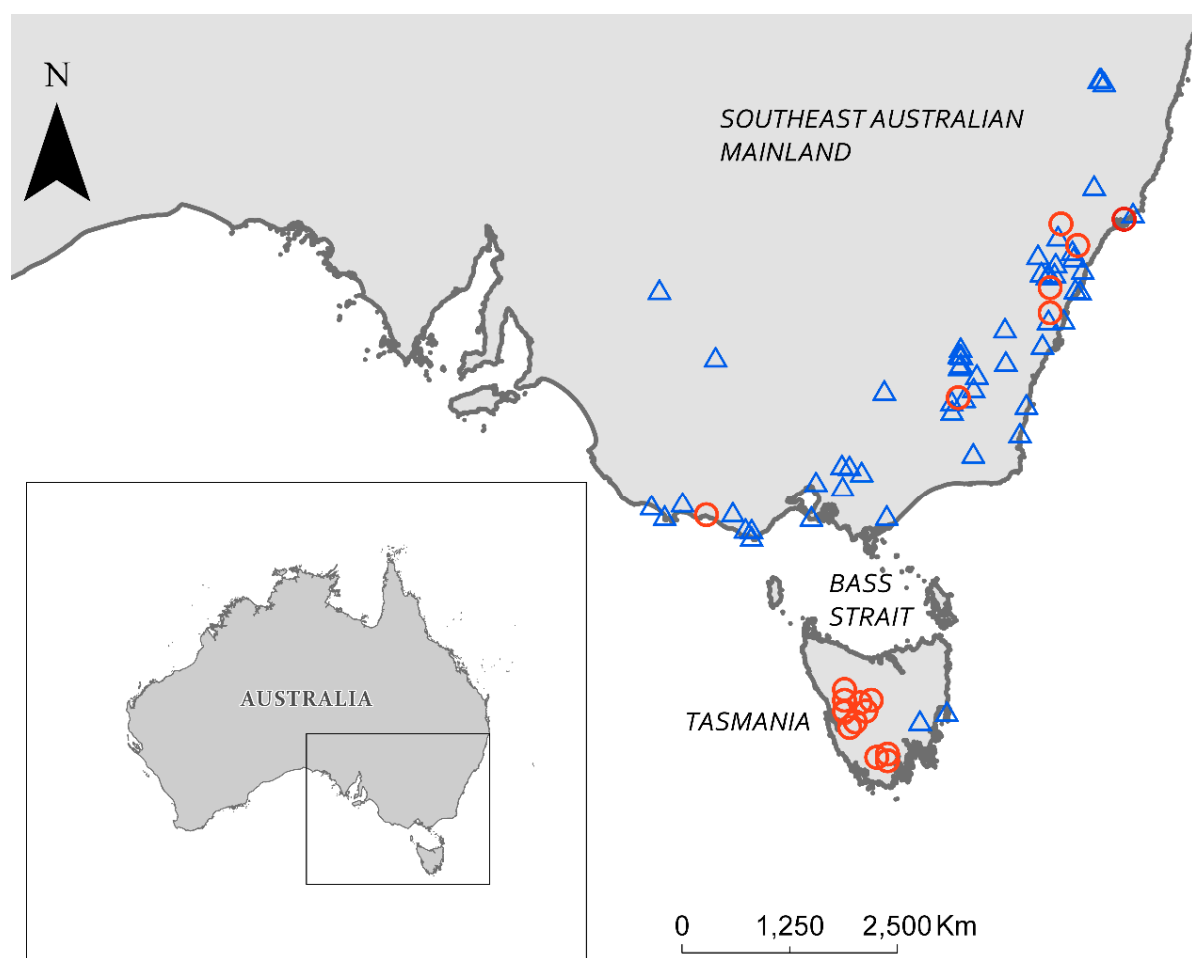

**Figure 1.** Sites of macroscopic (red circles) and microscopic (blue triangles) charcoal records from the mainland (55 sites) and Tasmania (16 sites). Fourteen of out of the 16 records from Tasmania are macroscopic charcoal records, while the remaining two sites from eastern Tasmania are microscopic charcoal records ( $<125\ \mu\text{m}$ ). For the southeast mainland, all charcoal records were extracted from the Global Paleofire Database, and records selected had at least one radiocarbon dates every 2500 years. Seven out of the 55 records from the southeast mainland are macroscopic charcoal records, while the remaining 48 are microscopic charcoal records (see Table S1 for details). Microscopic charcoal records were considered due to the limited availability of macroscopic charcoal records in eastern Tasmania and the southeast mainland. Although, macroscopic and microscopic charcoal records are usually used to infer local and regional fire signal, respectively (Whitlock and Larsen, 2001); however, composite analysis of multiple macroscopic and/or microscopic charcoal has proven to be effective in past regional biomass burned reconstruction [Mooney et al., 2011]. Also, only macroscopic charcoal records were selected for recurrence-rate-of-fire-episodes reconstruction.

**Table 1.** Site information for charcoal records (mostly >125 µm) from western Tasmania (W.Tas), eastern Tasmania (E.Tas), and southeast mainland (SEM). Numbers in bracket in SEM sites are site identification numbers in the Global Paleofire Database. Other 47 sites included for SEM are microscopic charcoal (<125 µm) and can be assessed in the Global Paleofire Database (<https://www.paleofire.org/>) using the setting ‘lat>-39, lat<(-28), long>140, long<154, date\_int<=2500’ in the ‘paleofire’ package in ‘R’.

| Site name                                                                                                                                                                                                                                                                                                                                                                                                    | Latitude   | Longitude | Elevation | Region | Source                      |
|--------------------------------------------------------------------------------------------------------------------------------------------------------------------------------------------------------------------------------------------------------------------------------------------------------------------------------------------------------------------------------------------------------------|------------|-----------|-----------|--------|-----------------------------|
| 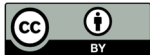 <p>Copyright: © 2021 by the authors. Licensee MDPI, Basel, Switzerland. This article is an open access article distributed under the terms and conditions of the Creative Commons Attribution (CC BY) license (<a href="http://creativecommons.org/licenses/by/4.0/">http://creativecommons.org/licenses/by/4.0/</a>).</p> |            |           |           |        |                             |
| Basin                                                                                                                                                                                                                                                                                                                                                                                                        | -41.98082° | 145.5483° | 577       | W.Tas  | Mariani and Fletcher (2017) |
| Gaye                                                                                                                                                                                                                                                                                                                                                                                                         | -41.82642° | 145.6033° | 892       | W.Tas  | Mariani and Fletcher (2017) |
| Gwendolyn                                                                                                                                                                                                                                                                                                                                                                                                    | -42.26238° | 145.8231° | 923       | W.Tas  | Mariani and Fletcher (2017) |
| Nancy                                                                                                                                                                                                                                                                                                                                                                                                        | -42.25877° | 145.8271° | 1037      | W.Tas  | Mariani and Fletcher (2017) |
| Vera                                                                                                                                                                                                                                                                                                                                                                                                         | -42.27459° | 145.8799° | 571       | W.Tas  | Mariani and Fletcher (2017) |
| Osborne                                                                                                                                                                                                                                                                                                                                                                                                      | -43.21621° | 146.7593° | 920       | W.Tas  | Mariani and Fletcher (2017) |
| Julia                                                                                                                                                                                                                                                                                                                                                                                                        | -41.88923° | 145.5761° | 616       | W.Tas  | Mariani and Fletcher (2017) |
| Square tarn                                                                                                                                                                                                                                                                                                                                                                                                  | -43.21431° | 146.5942° | 865       | W.Tas  | Mariani and Fletcher (2017) |
| Hartz                                                                                                                                                                                                                                                                                                                                                                                                        | -43.23809° | 146.7566° | 952       | W.Tas  | Mariani and Fletcher (2017) |
| Selina                                                                                                                                                                                                                                                                                                                                                                                                       | -41.87772° | 145.6094° | 516       | W.Tas  | Mariani and Fletcher (2017) |
| Owen tarn                                                                                                                                                                                                                                                                                                                                                                                                    | -42.09961° | 145.6094° | 969       | W.Tas  | Mariani and Fletcher (2017) |
| Isla                                                                                                                                                                                                                                                                                                                                                                                                         | -41.97053° | 145.6654° | 720       | W.Tas  | Mariani and Fletcher (2017) |
| Rolleston                                                                                                                                                                                                                                                                                                                                                                                                    | -41.92149° | 145.6248° | 650       | W.Tas  | Mariani and Fletcher (2017) |
| St. Clair                                                                                                                                                                                                                                                                                                                                                                                                    | -42.1°     | 146.1667° | 825       | W.Tas  | Hopf et al. (2000)          |
| Stoney*                                                                                                                                                                                                                                                                                                                                                                                                      | -42.35°    | 147.6°    | 394       | E.Tas  | Jones et al. (2017)         |
| Hazard*                                                                                                                                                                                                                                                                                                                                                                                                      | -42.17222° | 148.2892° | 1.8       | E.Tas  | Mackenzie and Moss (2017)   |
| Nwctw (215)                                                                                                                                                                                                                                                                                                                                                                                                  | -38.31°    | 142.36°   | 20        | SEM    | D'Costa et al. (1989)       |
| Blue (631)                                                                                                                                                                                                                                                                                                                                                                                                   | -36.14°    | 148.43°   | 1950      | SEM    | Raine (1974)                |
| Grey pole (632)                                                                                                                                                                                                                                                                                                                                                                                              | -32.61°    | 152.31°   | 9         | SEM    | Horn (2005)                 |
| Griffith (633)                                                                                                                                                                                                                                                                                                                                                                                               | -33.28°    | 151°      | 20        | SEM    | Mooney et al. (2007)        |
| Howes (635)                                                                                                                                                                                                                                                                                                                                                                                                  | -33.01°    | 150.66°   | 280       | SEM    | Mason (2004)                |
| Baraba (216)                                                                                                                                                                                                                                                                                                                                                                                                 | -34.23°    | 150.53°   | 305       | SEM    | Black et al. (2006)         |
| Kings (637)                                                                                                                                                                                                                                                                                                                                                                                                  | -33.01°    | 150.66°   | 280       | SEM    | Black (2001)                |
| Wingecarribee (729)                                                                                                                                                                                                                                                                                                                                                                                          | -34.56°    | 150.51°   | 685       | SEM    | de Montford (2008)          |

\*microscopic charcoal (<125 µm).

## References

1. Mariani, M.; Fletcher, M. -S. Long-term climate dynamics in the extra-tropics of the South Pacific revealed from sedimentary charcoal analysis. *Quat. Sci. Rev.* **2017**, *173*, 181–192.
2. Whitlock, C.; Larsen, C. Charcoal as fire proxy. In *Tracking environmental change using lake sediments: terrestrial, algal, and siliceous indicators*; J. P., Smol, et al. Eds.; Kluwer Academic Publishers, Dordrecht, The Netherlands, 2001.
3. Mooney, S.D.; Harrison, S.P.; Bartlein, P.J.; Daniau, A.-L.; Stevenson, J.; Brownlie, K.C.; Buckman, S.; Cupper, M.; Luly, J.; Black, M.; Colhoun, E.; D'Costa, D.; Dodson, J.; Haberle, S.; Hope, G.S.;

- Kershaw, P.; Kenyon, C.; McKenzie, M.; Williams, N. Late Quaternary fire regimes of Australasia. *Quat. Sci. Rev.* **2011**, *30*, 28–46.
4. Mackenzie, L.; Moss, P. A late Quaternary record of vegetation and climate change from Hazards Lagoon, eastern Tasmania. *Quat. Int.*, **2017**, 58–65.
  5. Jones, P. J.; Thomas, I.; Fletcher, M. -S. Long-term environmental change in eastern Tasmania: Vegetation, climate and fire at Stoney Lagoon. *Holocene* **2017**, *27*, 1340–1349.
  6. D'Costa, D.M.; Edney, P.; Kershaw, P.; De Deckker, P. Late Quaternary palaeoecology of Tower Hill, Victoria, Australia, *J. Biogeogr.*, **1989**, *16*, 461–482.
  7. Raine, J.I. Pollen Sedimentation in Relation to Quaternary Vegetation History of the Snowy Mountains of New South Wales. Unpublished PhD thesis Australian National University, Canberra. 1974.
  8. Horn, D. The fire history of Broughton Island. Unpublished BSc Hons Thesis, School of Biological, Earth and Environmental Sciences, UNSW, Sydney. 2005.
  9. Mooney, S. D.; Webb, M.; Attenbrow, V. A comparison of charcoal and archaeological information to address the influences on Holocene fire activity in the Sydney Basin. *Aust. Geogr.*, **2007**, *38*, 177–194.
  10. Mason, S. Late Holocene fire activity at Mellong Swamp, Wollemi National Park, NSW. Unpublished BSc Hons Thesis, School of Biological, Earth & Environmental Sciences, UNSW, Sydney. 2004.
  11. Black, M.P.; Mooney, S.D.; Martin, H.A. A >43,000-year vegetation and fire history from Lake Baraba, New South Wales, Australia. *Quat. Sci. Rev.*, **2006**, *25*, 3003–3016.
  12. Black, M.P. Fire, vegetation, humans and climate: A record of change during the past millennium from the Kings Tablelands. Unpublished BSc Hons Thesis, School of Geography, UNSW, Sydney. 2011.
  13. de Montford, M. Late Holocene fire history: Human impacts and climate variability at Wingecarribee Swamp. Unpublished BSc Hons Thesis, School of Biological, Earth & Environmental Sciences, UNSW, Sydney. 2008.

**AMS dates and age-depth model of unpublished sites on the Furneaux Group islands, Bass Strait.**

**Table 2.** AMS radiocarbon dates for Apple Orchard Lagoon, Bumpy Lagoon, Tobacco Lagoon, and Piano Point Lagoon, measured at 'DirectAMS', Washington.

| Site                 | Lab ID       | <sup>14</sup> C yr BP | Error (1σ) | Depth cm |
|----------------------|--------------|-----------------------|------------|----------|
| Apple Orchard Lagoon | D-AMS 036727 | 2207                  | 35         | 21       |
| Apple Orchard Lagoon | D-AMS 036728 | 5819                  | 33         | 43       |
| Apple Orchard Lagoon | D-AMS 036729 | 6292                  | 30         | 65       |
| Apple Orchard Lagoon | D-AMS 036730 | 6991                  | 32         | 85       |
| Bumpy Lagoon         | D-AMS 026692 | 486                   | 25         | 18       |
| Bumpy Lagoon         | D-AMS 032457 | 2702                  | 29         | 28       |
| Bumpy Lagoon         | D-AMS 032458 | 3396                  | 25         | 36       |
| Bumpy Lagoon         | D-AMS 026693 | 3584                  | 40         | 44       |
| Tobacco Lagoon       | D-AMS 036733 | 576                   | 37         | 15       |
| Tobacco Lagoon       | D-AMS 036734 | 3004                  | 37         | 41       |
| Piano Point Lagoon   | D-AMS 036735 | 982                   | 25         | 15       |

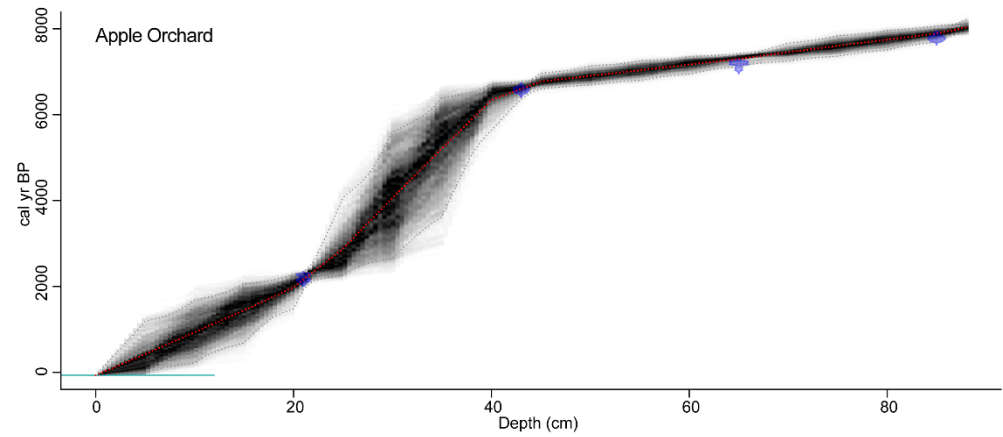

**Figure 2.** Age-depth model (Bacon) for Apple Orchard Lagoon, showing calibrated  $^{14}\text{C}$  dates (purple), age-depth model (dark shaded grey), 95% confidence intervals of calibrated range (light shaded grey), and single 'best' model based on the weighted mean age for each depth (red curve). Cal yr BP is calendar year before present.

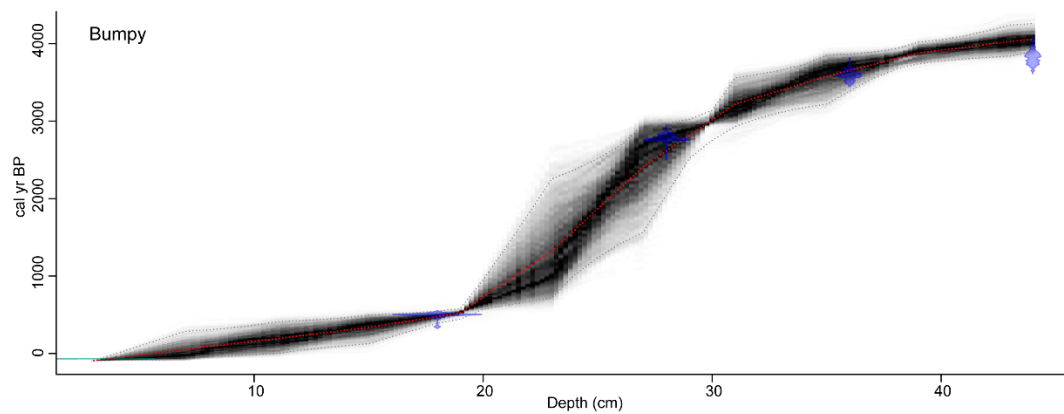

**Figure 3.** Age-depth model (Bacon) for Bumpy Lagoon, showing calibrated  $^{14}\text{C}$  dates (purple), age-depth model (dark shaded grey), 95% confidence intervals of calibrated range (light shaded grey), and single 'best' model based on the weighted mean age for each depth (red curve).

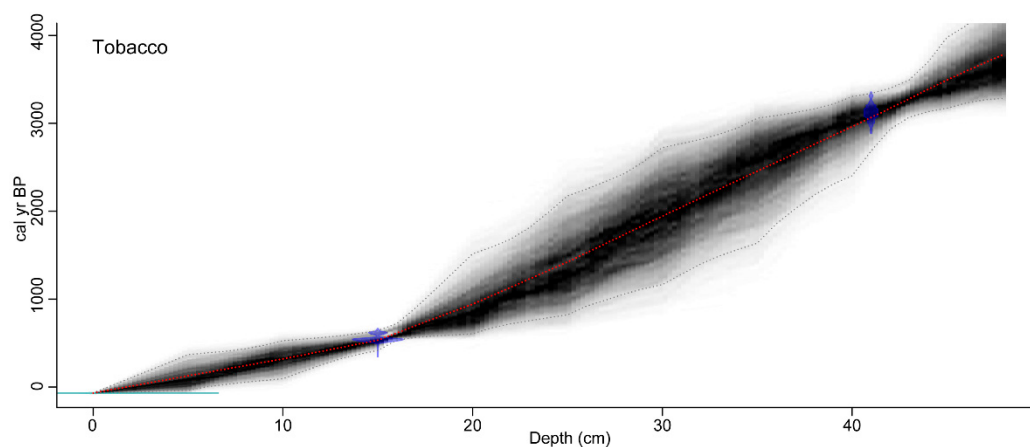

**Figure 4.** Age-depth model (Bacon) for Tobacco Lagoon, showing calibrated  $^{14}\text{C}$  dates (purple), age-depth model (dark shaded grey), 95% confidence intervals of calibrated range (light shaded grey), and single 'best' model based on the weighted mean age for each depth (red curve).

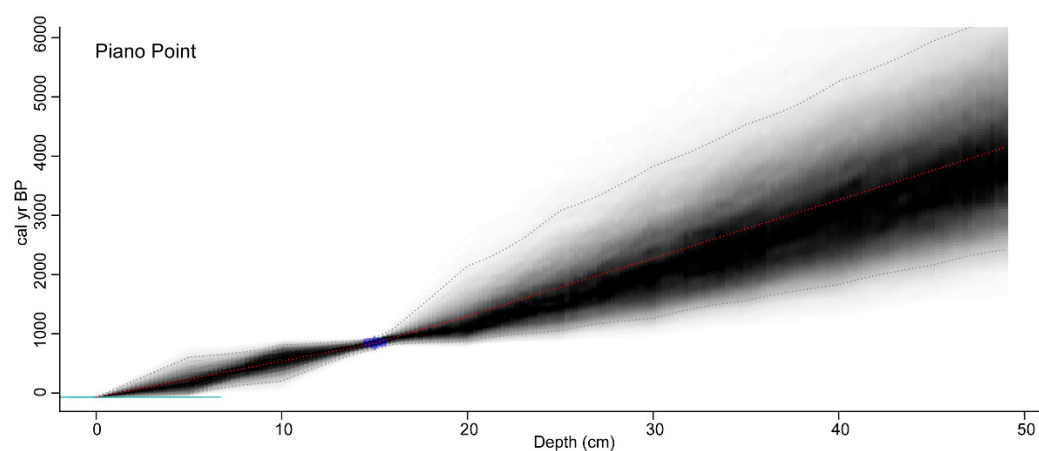

**Figure 5.** Age-depth model (Bacon) for Piano Point Lagoon, showing calibrated  $^{14}\text{C}$  dates (purple), age-depth model (dark shaded grey), 95% confidence intervals of calibrated range (light shaded grey), and single 'best' model based on the weighted mean age for each depth (red curve).

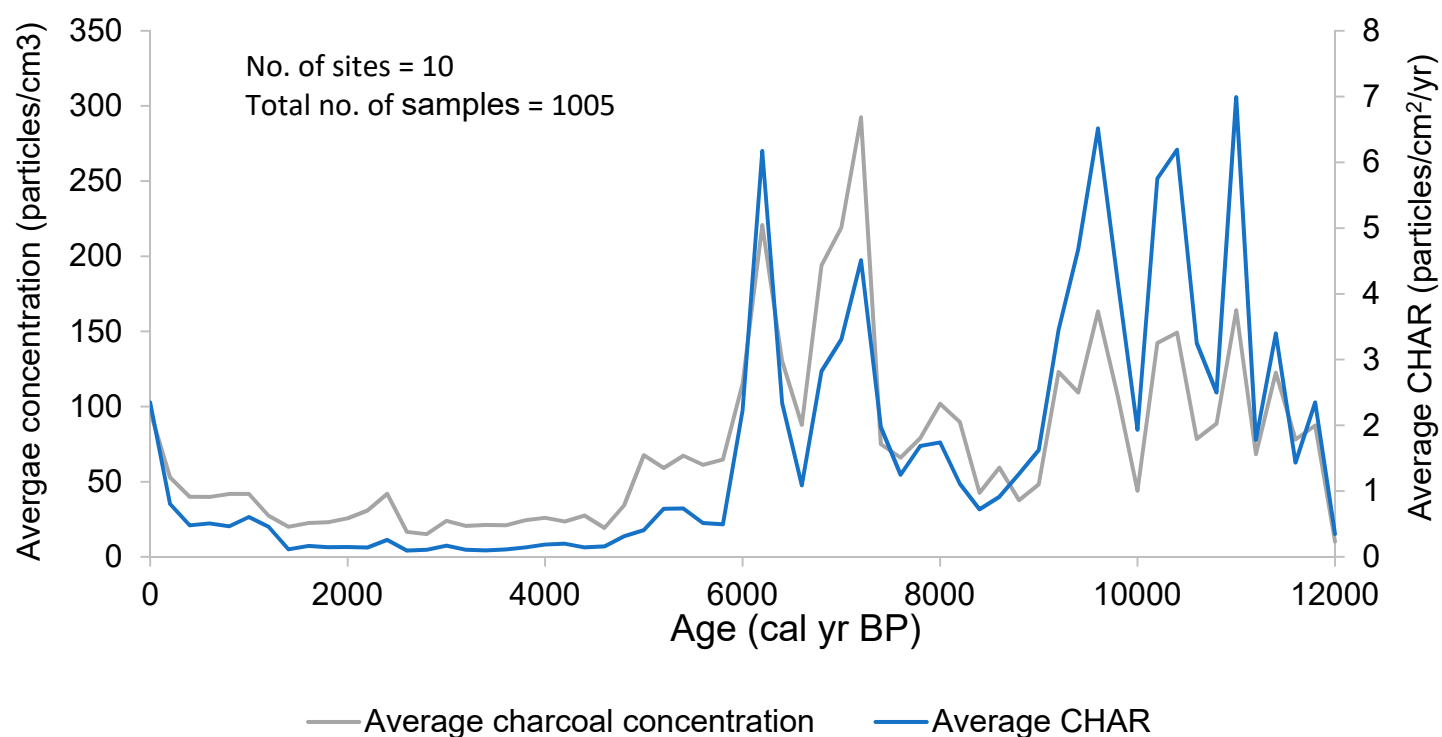

**Figure 6.** Average charcoal concentration and charcoal accumulation rates (CHAR) for the Furneaux Group Islands during the Holocene.

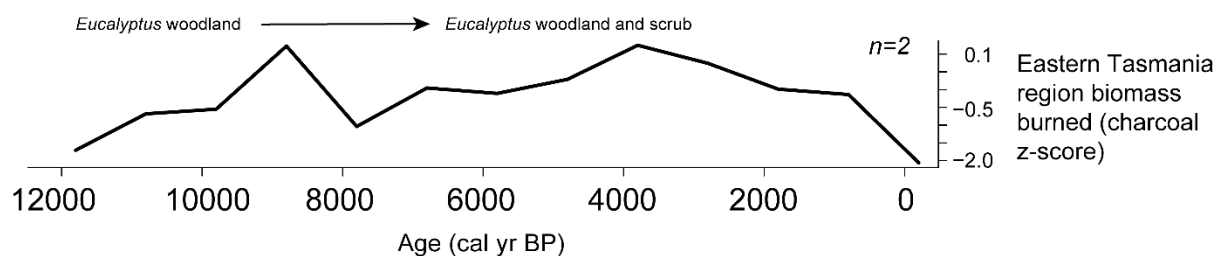

**Figure 7.** Regional biomass burned (charcoal z-score) for western Tasmania.
